# Supplementary material for: Rapamycin toxicity in MIN6 cells and rat and human islets is mediated by the inhibition of mTOR complex 2 (mTORC2)
Source: Springer Nature journal article supplement (doi:10.1007/s00125-012-2475-7), 2012-02-07
Supplement: MOESM3 [file 8090678]

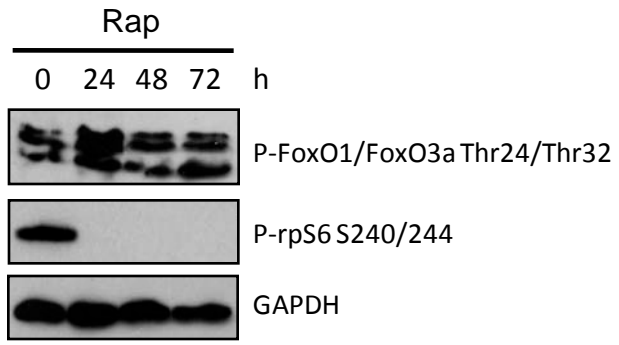

Supplementary Figure 3
